# Supplementary material
Source: publisher figshare collection journal article supplement (https://springernature.figshare.com/ndownloader/files/24505411)
Supplement: Supplementary file 1 [file 24505411]

[Pekka J. Vuorinen, Mervi Rokka, Tiina Ritvanen, Reijo Käkelä, Soili Nikonen, Tapani Pakarinen, and Marja Keinänen: Changes in thiamine concentrations, fatty acid composition, and some other lipid-related biochemical indices in Baltic Sea Atlantic salmon (*Salmo salar*) during the spawning run and pre-spawning fasting. *Helgoland Marine Research 2020*]

**Additional file 1.** The identified fatty acids (FAs) with the abbreviation and common names. The 16 FAs, the mean proportion of which was >0.5%, and which were included in the principal component analysis (PCA), are also indicated.

|  |  |  |
| --- | --- | --- |
| Abbreviation | Common name | Included in the 16 FAs |
|  |  |  |
| 14:0 | myristic acid | 1 |
| 14:1*n-5* | myristoleic acid |  |
| 15:0 | pentadecanoic acid |  |
| 16:0 | palmitic acid | 1 |
| 16:1*n-7* | palmitoleic acid | 1 |
| 17:0 | heptadecanoic acid | 1 |
| 17:1*n-8* | heptadecenoic acid | 1 |
| 18:0 | stearic acid | 1 |
| 18:1*n-9* | oleic acid | 1 |
| 18:1*n-7* | vaccenic acid | 1 |
| 18:2*n-6* | linoleic acid | 1 |
| 18:3*n-3* | alpha-linolenic acid | 1 |
| 18:4*n-3* | stearidonic acid |  |
| 20:0 | arachidic acid |  |
| 20:1*n-9* | gondoic acid | 1 |
| 20:2*n-6* | eicosadienoic acid | 1 |
| 20:3*n-3* | eicosatrienoic acid |  |
| 20:4*n-6* | arachidonic acid (ARA) | 1 |
| 20:5*n-3* | eicosapentaenoic acid (EPA) | 1 |
| 22:5*n-3* | docosapentaenoic acid (DPA) | 1 |
| 22:6*n-3* | docosahexaenoic acid (DHA) | 1 |
